# Supplementary material
Source: publisher figshare collection journal article supplement (https://geolsoc.figshare.com/ndownloader/files/17470055)

### Online Supplementary material A5

SiO<sub>2</sub>–K<sub>2</sub>O (in wt%) classification diagram for metaigneous rocks of the KU of Peccerillo & Taylor (1976).

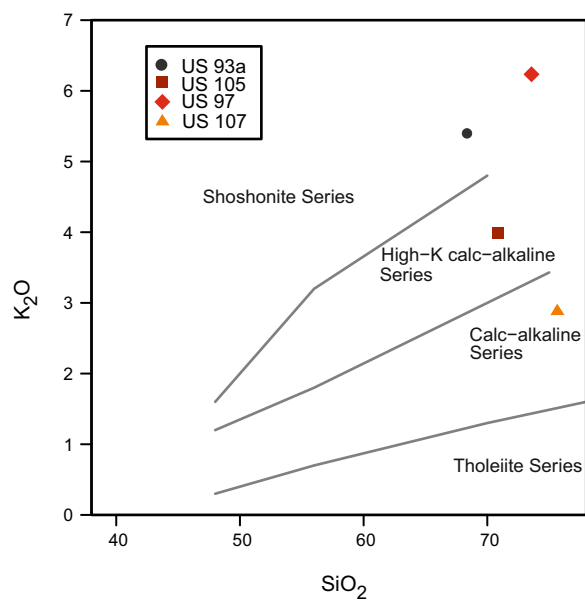

Supplement: Supplementary file 1 [file 17470055]
